# Supplementary material for: Identification of hub genes and prediction of the ceRNA network in adult sepsis
Source: PeerJ. 2025 Aug 13;13:e19619. doi: 10.7717/peerj.19619 (PMC12357545; doi:10.7717/peerj.19619)
Supplement: Supplemental Information 5 [file peerj-13-19619-s005.xls]

## Sheet: Sheet1
ITEM TO CHECK	IMPORTANCE	CHECKLIST
EXPERIMENTAL DESIGN
Definition of experimental and control groups	E	171-172，212
Number within each group	E	172195
Assay carried out by core lab or investigator's lab?	D	Investigator's lab
Acknowledgement of authors' contributions	D
SAMPLE
Description	E	212-230
Volume/mass of sample processed	D	214223
Microdissection or macrodissection	E	208
Processing procedure	E	208
If frozen - how and how quickly?	E	208
If fixed - with what, how quickly?	E	N/A
Sample storage conditions and duration (especially for FFPE samples)	E	208-209
NUCLEIC ACID EXTRACTION
Procedure and/or instrumentation	E	212-214
Name of kit and details of any modifications	E	212-214
Source of additional reagents used	D	NA
Details of DNase or RNAse treatment	E	21-217
Contamination assessment (DNA or RNA)	E	N/A
Nucleic acid quantification	E	N/A
Instrument and method	E	N/A
Purity (A260/A280)	D	N/A
Yield	D	N/A
RNA integrity method/instrument	E	N/A
RIN/RQI or Cq of 3' and 5' transcripts	E	N/A
Electrophoresis traces	D	N/A
Inhibition testing (Cq dilutions, spike or other)	E	N/A
REVERSE TRANSCRIPTION
Complete reaction conditions	E	216
Amount of RNA and reaction volume	E	214
Priming oligonucleotide (if using GSP) and concentration	E	Table S1
Reverse transcriptase and concentration	E	214
Temperature and time	E	216
Manufacturer of reagents and catalogue numbers	D	215
Cqs with and without RT	D*	N/A
Storage conditions of cDNA	D	N/A
qPCR TARGET INFORMATION
If multiplex, efficiency and LOD of each assay.	E	NA
Sequence accession number	E	Table S1
Location of amplicon	D	N/A
Amplicon length	E	Table S1
In silico specificity screen (BLAST, etc)	E	YES
Pseudogenes, retropseudogenes or other homologs?	D	N/A
Sequence alignment	D	N/A
Secondary structure analysis of amplicon	D	N/A
Location of each primer by exon or intron (if applicable)	E	N/A
What splice variants are targeted?	E	N/A
qPCR OLIGONUCLEOTIDES
Primer sequences	E	Table S1
RTPrimerDB Identification Number	D	N/A
Probe sequences	D**	N/A
Location and identity of any modifications	E	N/A
Manufacturer of oligonucleotides	D	217
Purification method	D	N/A
qPCR PROTOCOL
Complete reaction conditions	E	220-223
Reaction volume and amount of cDNA/DNA	E	223
Primer, (probe), Mg++ and dNTP concentrations	E	N/A
Polymerase identity and concentration	E	222
Buffer/kit identity and manufacturer	E	222
Exact chemical constitution of the buffer	D	N/A
Additives (SYBR Green I, DMSO, etc.)	E	222
Manufacturer of plates/tubes and catalog number	D	N/A
Complete thermocycling parameters	E	221
Reaction setup (manual/robotic)	D	N/A
Manufacturer of qPCR instrument	E	219
qPCR VALIDATION
Evidence of optimisation (from gradients)	D	N/A
Specificity (gel, sequence, melt, or digest)	E	N/A
For SYBR Green I, Cq of the NTC	E	N/A
Standard curves with slope and y-intercept	E	N/A
PCR efficiency calculated from slope	E	N/A
Confidence interval for PCR efficiency or standard error	D	N/A
r2 of standard curve	E	N/A
Linear dynamic range	E	N/A
Cq variation at lower limit	E	N/A
Confidence intervals throughout range	D	N/A
Evidence for limit of detection	E	N/A
If multiplex, efficiency and LOD of each assay.	E	N/A
DATA ANALYSIS
qPCR analysis program (source, version)	E	N/A
Cq method determination	E	N/A
Outlier identification and disposition	E	N/A
Results of NTCs	E	YES
Justification of number and choice of reference genes	E	225
Description of normalisation method	E	YES
Number and concordance of biological replicates	D	YES
Number and stage (RT or qPCR) of technical replicates	E	224 (No replicates)
Repeatability (intra-assay variation)	E	NA
Reproducibility (inter-assay variation, %CV)	D	NA
Power analysis	D	NA
Statistical methods for result significance	E	262-263
Software (source, version)	E	NA
Cq or raw data submission using RDML	D	NA
Table 1. MIQE checklist for authors, reviewers and editors. All essential information (E) must be submitted with the manuscript. Desirable
information (D) should be submitted if available. If using primers obtained from RTPrimerDB, information on qPCR target, oligonucleotides,
protocols and validation is available from that source.
*: Assessing the absence of DNA using a no RT assay is essential when first extracting RNA. Once the sample has been validated as
RDNA-free, inclusion of a no-RT control is desirable, but no longer essential.
**: Disclosure of the probe sequence is highly desirable and strongly encouraged. However, since not all commercial pre-designed assay
vendors provide this information, it cannot be an essential requirement. Use of such assays is advised against.
