# Supplementary material for: Identification of hub genes and prediction of the ceRNA network in adult sepsis
Source: PeerJ. 2025 Aug 13;13:e19619. doi: 10.7717/peerj.19619 (PMC12357545; doi:10.7717/peerj.19619)
Supplement: Supplemental Information 6 [file peerj-13-19619-s006.xls]

## Sheet: Results
Block Type	96alum
Chemistry	SYBR_GREEN
Experiment File Name	C:\Users\jond\Desktop\2022\WJH\模板\CHEN4.eds
Experiment Run End Time	2023-09-27 01:13:13 上午 CST
Instrument Type	sds7500
Passive Reference
Well	Sample Name	Target Name	Task	Reporter	Quencher	RQ	RQ Min	RQ Max	Cт	Cт Mean	Cт SD	ΔCт	ΔCт Mean	ΔCт SE	HK Control ΔCт Mean	HK Control ΔCт SE	ΔΔCт	Automatic Ct Threshold	Ct Threshold	Automatic Baseline	Baseline Start	Baseline End	Efficiency	Tm1	Tm2	Tm3	Comments	HIGHSD	MTP
A1	Ctrl1	CLEC4D	UNKNOWN	SYBR	None	1	0.0838672	11.9236	28.0507	29.3301	2.21872		-0.442811	1.28789			0	TRUE	28122.5	TRUE	3	26	1	80.896	69.7318			Y	Y
A2	Ctrl2	CLEC4D	UNKNOWN	SYBR	None	1	0.0838672	11.9236	28.1619	29.3301	2.21872		-0.442811	1.28789			0	TRUE	28122.5	TRUE	3	21	1	80.896	69.7318			Y	Y
A3	Ctrl3	CLEC4D	UNKNOWN	SYBR	None	1	0.0838672	11.9236	27.9396	29.3301	2.21872		-0.442811	1.28789			0	TRUE	28122.5	TRUE	3	21	1	80.896	69.7318			Y	Y
A4	Ctrl1	GPR84	UNKNOWN	SYBR	None	1	0.628692	1.5906	32.8624	33.121	0.34818		3.34804	0.241163			0	TRUE	26466.3	TRUE	3	26	1	88.0179	69.7318	77.0462		N	Y
A5	Ctrl2	GPR84	UNKNOWN	SYBR	None	1	0.628692	1.5906	33.5169	33.121	0.34818		3.34804	0.241163			0	TRUE	26466.3	TRUE	3	26	1	88.2104	69.7318	77.0462		N	Y
A6	Ctrl3	GPR84	UNKNOWN	SYBR	None	1	0.628692	1.5906	32.9836	33.121	0.34818		3.34804	0.241163			0	TRUE	26466.3	TRUE	3	26	1	88.4029	77.2387	69.7318		N	Y
A7	Ctrl1	S100A12	UNKNOWN	SYBR	None	1	0.738834	1.35348	24.7678	24.6859	0.144781		-5.08697	0.15728			0	TRUE	32923.9	TRUE	3	17	1	83.7832				N	N
A8	Ctrl2	S100A12	UNKNOWN	SYBR	None	1	0.738834	1.35348	24.5188	24.6859	0.144781		-5.08697	0.15728			0	TRUE	32923.9	TRUE	3	17	1	83.7832	69.7318			N	Y
A9	Ctrl3	S100A12	UNKNOWN	SYBR	None	1	0.738834	1.35348	24.7713	24.6859	0.144781		-5.08697	0.15728			0	TRUE	32923.9	TRUE	3	17	1	83.9757	69.7318			N	Y
A10	Ctrl1	HK3	UNKNOWN	SYBR	None				29.5241	29.7729	0.230757							TRUE	37310.9	TRUE	3	22	1	85.5156	69.7318	77.0462		N	Y
A11	Ctrl2	HK3	UNKNOWN	SYBR	None				29.8147	29.7729	0.230757							TRUE	37310.9	TRUE	3	22	1	85.5156	69.5393	77.0462		N	Y
A12	Ctrl3	HK3	UNKNOWN	SYBR	None				29.9799	29.7729	0.230757							TRUE	37310.9	TRUE	3	21	1	85.5156	69.5393	77.0462		N	Y
B1	Ctrl4	CLEC4D	UNKNOWN	SYBR	None	0.565168	0.229208	1.39356	31.2272	30.8786	0.576878		0.380437	0.468952			0.823248	TRUE	28122.5	TRUE	3	26	1	81.0884	69.7318	63.9572		Y	Y
B2	Ctrl5	CLEC4D	UNKNOWN	SYBR	None	0.565168	0.229208	1.39356	30.2127	30.8786	0.576878		0.380437	0.468952			0.823248	TRUE	28122.5	TRUE	3	21	1	81.2809	69.7318			Y	Y
B3	Ctrl6	CLEC4D	UNKNOWN	SYBR	None	0.565168	0.229208	1.39356	31.1959	30.8786	0.576878		0.380437	0.468952			0.823248	TRUE	28122.5	TRUE	3	24	1	81.0884	69.7318			Y	Y
B4	Ctrl4	GPR84	UNKNOWN	SYBR	None	0.659908	0.307874	1.41447	34.8837	34.4459	0.379307		3.9477	0.396163			0.599663	TRUE	26466.3	TRUE	3	27	1	88.4029	69.7318	76.8538		N	Y
B5	Ctrl5	GPR84	UNKNOWN	SYBR	None	0.659908	0.307874	1.41447	34.2156	34.4459	0.379307		3.9477	0.396163			0.599663	TRUE	26466.3	TRUE	3	26	1	88.5954	69.7318	77.0462		N	Y
B6	Ctrl6	GPR84	UNKNOWN	SYBR	None	0.659908	0.307874	1.41447	34.2384	34.4459	0.379307		3.9477	0.396163			0.599663	TRUE	26466.3	TRUE	3	26	1	88.7879	77.4312	69.7318		N	Y
B7	Ctrl4	S100A12	UNKNOWN	SYBR	None	0.315004	0.158604	0.625628	26.9755	27.0778	0.233281		-3.42041	0.356549			1.66656	TRUE	32923.9	TRUE	3	21	1	84.1682	69.7318			N	Y
B8	Ctrl5	S100A12	UNKNOWN	SYBR	None	0.315004	0.158604	0.625628	26.913	27.0778	0.233281		-3.42041	0.356549			1.66656	TRUE	32923.9	TRUE	3	21	1	84.1682	69.7318			N	Y
B9	Ctrl6	S100A12	UNKNOWN	SYBR	None	0.315004	0.158604	0.625628	27.3447	27.0778	0.233281		-3.42041	0.356549			1.66656	TRUE	32923.9	TRUE	3	19	1	84.1682	69.7318			N	Y
B10	Ctrl4	HK3	UNKNOWN	SYBR	None				29.858	30.4982	0.571805							TRUE	37310.9	TRUE	3	21	1	85.7081	69.7318	77.0462		Y	Y
B11	Ctrl5	HK3	UNKNOWN	SYBR	None				30.9584	30.4982	0.571805							TRUE	37310.9	TRUE	3	21	1	85.7081	69.7318	77.0462		Y	Y
B12	Ctrl6	HK3	UNKNOWN	SYBR	None				30.6781	30.4982	0.571805							TRUE	37310.9	TRUE	3	21	1	85.5156	69.7318	77.2387		Y	Y
C1	Ctrl7	CLEC4D	UNKNOWN	SYBR	None	0.886203	0.490241	1.60198	30.0616	29.6709	0.409447		-0.26852	0.30764			0.17429	TRUE	28122.5	TRUE	3	22	1	81.2809	69.7318	63.9572		N	Y
C2	Ctrl8	CLEC4D	UNKNOWN	SYBR	None	0.886203	0.490241	1.60198	29.706	29.6709	0.409447		-0.26852	0.30764			0.17429	TRUE	28122.5	TRUE	3	21	1	81.2809	69.7318			N	Y
C3	Ctrl9	CLEC4D	UNKNOWN	SYBR	None	0.886203	0.490241	1.60198	29.245	29.6709	0.409447		-0.26852	0.30764			0.17429	TRUE	28122.5	TRUE	3	21	1	81.4734	69.7318			N	Y
C4	Ctrl7	GPR84	UNKNOWN	SYBR	None	0.606841	0.194232	1.89596	33.6906	34.0081	0.966934		4.06865	0.591958			0.72061	TRUE	26466.3	TRUE	3	26	1	88.2104	69.7318	77.0462		Y	Y
C5	Ctrl8	GPR84	UNKNOWN	SYBR	None	0.606841	0.194232	1.89596	33.2397	34.0081	0.966934		4.06865	0.591958			0.72061	TRUE	26466.3	TRUE	3	26	1	88.5954	69.7318	77.0462		Y	Y
C6	Ctrl9	GPR84	UNKNOWN	SYBR	None	0.606841	0.194232	1.89596	35.0938	34.0081	0.966934		4.06865	0.591958			0.72061	TRUE	26466.3	TRUE	3	27	1	88.7879	69.7318	77.0462		Y	Y
C7	Ctrl7	S100A12	UNKNOWN	SYBR	None	0.645216	0.373897	1.11342	25.7688	25.4846	0.353339		-4.45483	0.283507			0.632146	TRUE	32923.9	TRUE	3	15	1	84.1682				N	N
C8	Ctrl8	S100A12	UNKNOWN	SYBR	None	0.645216	0.373897	1.11342	25.596	25.4846	0.353339		-4.45483	0.283507			0.632146	TRUE	32923.9	TRUE	3	17	1	84.1682				N	N
C9	Ctrl9	S100A12	UNKNOWN	SYBR	None	0.645216	0.373897	1.11342	25.089	25.4846	0.353339		-4.45483	0.283507			0.632146	TRUE	32923.9	TRUE	3	15	1	84.1682	69.7318			N	Y
C10	Ctrl7	HK3	UNKNOWN	SYBR	None				29.8749	29.9394	0.341							TRUE	37310.9	TRUE	3	21	1	85.7081	69.7318	77.2387		N	Y
C11	Ctrl8	HK3	UNKNOWN	SYBR	None				29.6353	29.9394	0.341							TRUE	37310.9	TRUE	3	21	1	85.5156	69.7318	77.0462		N	Y
C12	Ctrl9	HK3	UNKNOWN	SYBR	None				30.308	29.9394	0.341							TRUE	37310.9	TRUE	3	21	1	85.5156	69.7318	77.0462		N	Y
D1	Sepsis1	CLEC4D	UNKNOWN	SYBR	None	1.0879	0.674335	1.7551	27.6723	27.5518	0.31517		-0.564355	0.248521			-0.121544	TRUE	28122.5	TRUE	3	21	1	81.2809	69.7318			N	Y
D2	Sepsis2	CLEC4D	UNKNOWN	SYBR	None	1.0879	0.674335	1.7551	27.7889	27.5518	0.31517		-0.564355	0.248521			-0.121544	TRUE	28122.5	TRUE	3	21	1	81.2809	69.7318			N	Y
D3	Sepsis3	CLEC4D	UNKNOWN	SYBR	None	1.0879	0.674335	1.7551	27.1941	27.5518	0.31517		-0.564355	0.248521			-0.121544	TRUE	28122.5	TRUE	3	21	1	81.4734	69.7318			N	Y
D4	Sepsis1	GPR84	UNKNOWN	SYBR	None	0.558147	0.394459	0.78976	32.202	32.3055	0.107874		4.18932	0.180364			0.841283	TRUE	26466.3	TRUE	3	24	1	88.2104	69.7318	77.0462		N	Y
D5	Sepsis2	GPR84	UNKNOWN	SYBR	None	0.558147	0.394459	0.78976	32.4172	32.3055	0.107874		4.18932	0.180364			0.841283	TRUE	26466.3	TRUE	3	26	1	88.4029	69.7318	77.0462		N	Y
D6	Sepsis3	GPR84	UNKNOWN	SYBR	None	0.558147	0.394459	0.78976	32.2971	32.3055	0.107874		4.18932	0.180364			0.841283	TRUE	26466.3	TRUE	3	26	1	88.5954	69.7318	77.2387		N	Y
D7	Sepsis1	S100A12	UNKNOWN	SYBR	None	0.239438	0.161728	0.354489	25.3183	25.0914	0.196863		-3.0247	0.203888			2.06227	TRUE	32923.9	TRUE	3	15	1	84.3607				N	N
D8	Sepsis2	S100A12	UNKNOWN	SYBR	None	0.239438	0.161728	0.354489	24.9656	25.0914	0.196863		-3.0247	0.203888			2.06227	TRUE	32923.9	TRUE	3	16	1	84.3607				N	N
D9	Sepsis3	S100A12	UNKNOWN	SYBR	None	0.239438	0.161728	0.354489	24.9904	25.0914	0.196863		-3.0247	0.203888			2.06227	TRUE	32923.9	TRUE	3	16	1	84.1682	69.7318			N	Y
D10	Sepsis1	HK3	UNKNOWN	SYBR	None				27.7804	28.1161	0.293183							TRUE	37310.9	TRUE	3	21	1	85.7081	69.7318	77.0462		N	Y
D11	Sepsis2	HK3	UNKNOWN	SYBR	None				28.2461	28.1161	0.293183							TRUE	37310.9	TRUE	3	21	1	85.7081	69.7318	77.0462		N	Y
D12	Sepsis3	HK3	UNKNOWN	SYBR	None				28.3218	28.1161	0.293183							TRUE	37310.9	TRUE	3	21	1	85.7081	69.7318	77.2387		N	Y
E1	Sepsis4	CLEC4D	UNKNOWN	SYBR	None	0.501639	0.370837	0.678577	27.8272	27.5415	0.248681		0.552469	0.156986			0.995279	TRUE	28122.5	TRUE	3	21	1	81.2809	69.7318			N	Y
E2	Sepsis5	CLEC4D	UNKNOWN	SYBR	None	0.501639	0.370837	0.678577	27.4241	27.5415	0.248681		0.552469	0.156986			0.995279	TRUE	28122.5	TRUE	3	21	1	81.0884	69.7318			N	Y
E3	Sepsis6	CLEC4D	UNKNOWN	SYBR	None	0.501639	0.370837	0.678577	27.3732	27.5415	0.248681		0.552469	0.156986			0.995279	TRUE	28122.5	TRUE	3	21	1	81.0884	69.7318			N	Y
E4	Sepsis4	GPR84	UNKNOWN	SYBR	None	2.58097	1.8671	3.56777	28.8398	28.9692	0.269857		1.98013	0.168241			-1.36791	TRUE	26466.3	TRUE	3	21	1	88.2104	69.7318	77.0462		N	Y
E5	Sepsis5	GPR84	UNKNOWN	SYBR	None	2.58097	1.8671	3.56777	28.7884	28.9692	0.269857		1.98013	0.168241			-1.36791	TRUE	26466.3	TRUE	3	21	1	88.7879	69.7318	77.0462		N	Y
E6	Sepsis6	GPR84	UNKNOWN	SYBR	None	2.58097	1.8671	3.56777	29.2794	28.9692	0.269857		1.98013	0.168241			-1.36791	TRUE	26466.3	TRUE	3	21	1	88.9803	69.7318	77.0462		N	Y
E7	Sepsis4	S100A12	UNKNOWN	SYBR	None	0.623197	0.458948	0.846228	22.6666	22.5843	0.252424		-4.40473	0.158965			0.68224	TRUE	32923.9	TRUE	3	14	1	84.3607	69.7318			N	Y
E8	Sepsis5	S100A12	UNKNOWN	SYBR	None	0.623197	0.458948	0.846228	22.7853	22.5843	0.252424		-4.40473	0.158965			0.68224	TRUE	32923.9	TRUE	3	15	1	84.3607				N	N
E9	Sepsis6	S100A12	UNKNOWN	SYBR	None	0.623197	0.458948	0.846228	22.301	22.5843	0.252424		-4.40473	0.158965			0.68224	TRUE	32923.9	TRUE	3	14	1	84.1682	69.7318			N	Y
E10	Sepsis4	HK3	UNKNOWN	SYBR	None				26.9029	26.989	0.109963							TRUE	37310.9	TRUE	3	16	1	85.7081	69.7318	77.0462		N	Y
E11	Sepsis5	HK3	UNKNOWN	SYBR	None				26.9513	26.989	0.109963							TRUE	37310.9	TRUE	3	19	1	85.7081	69.7318	77.0462		N	Y
E12	Sepsis6	HK3	UNKNOWN	SYBR	None				27.1129	26.989	0.109963							TRUE	37310.9	TRUE	3	20	1	85.7081	69.7318	77.2387		N	Y
F1	Sepsis7	CLEC4D	UNKNOWN	SYBR	None	0.471593	0.331093	0.671714	29.2529	29.2694	0.23033		0.641575	0.183798			1.08439	TRUE	28122.5	TRUE	3	21	1	80.896	69.7318			N	Y
F2	Sepsis8	CLEC4D	UNKNOWN	SYBR	None	0.471593	0.331093	0.671714	29.0478	29.2694	0.23033		0.641575	0.183798			1.08439	TRUE	28122.5	TRUE	3	21	1	81.0884	69.7318			N	Y
F3	Sepsis9	CLEC4D	UNKNOWN	SYBR	None	0.471593	0.331093	0.671714	29.5076	29.2694	0.23033		0.641575	0.183798			1.08439	TRUE	28122.5	TRUE	3	21	1	81.0884	69.7318			N	Y
F4	Sepsis7	GPR84	UNKNOWN	SYBR	None	1.7467	1.2669	2.40821	31.1877	31.1713	0.187754		2.5434	0.166879			-0.804635	TRUE	26466.3	TRUE	3	26	1	88.0179	69.7318	77.0462		N	Y
F5	Sepsis8	GPR84	UNKNOWN	SYBR	None	1.7467	1.2669	2.40821	31.3503	31.1713	0.187754		2.5434	0.166879			-0.804635	TRUE	26466.3	TRUE	3	22	1	88.4029	69.7318	76.8538		N	Y
F6	Sepsis9	GPR84	UNKNOWN	SYBR	None	1.7467	1.2669	2.40821	30.9758	31.1713	0.187754		2.5434	0.166879			-0.804635	TRUE	26466.3	TRUE	3	21	1	88.7879	69.7318	77.0462		N	Y
F7	Sepsis7	S100A12	UNKNOWN	SYBR	None	1.42205	1.0664	1.89633	23.1687	23.0329	0.137139		-5.59495	0.149556			-0.507977	TRUE	32923.9	TRUE	3	14	1	84.1682	69.7318			N	Y
F8	Sepsis8	S100A12	UNKNOWN	SYBR	None	1.42205	1.0664	1.89633	23.0357	23.0329	0.137139		-5.59495	0.149556			-0.507977	TRUE	32923.9	TRUE	3	15	1	84.3607	69.7318			N	Y
F9	Sepsis9	S100A12	UNKNOWN	SYBR	None	1.42205	1.0664	1.89633	22.8944	23.0329	0.137139		-5.59495	0.149556			-0.507977	TRUE	32923.9	TRUE	3	15	1	84.1682	69.5393			N	Y
F10	Sepsis7	HK3	UNKNOWN	SYBR	None				28.6582	28.6279	0.219758							TRUE	37310.9	TRUE	3	21	1	85.7081	69.7318	77.2387		N	Y
F11	Sepsis8	HK3	UNKNOWN	SYBR	None				28.3945	28.6279	0.219758							TRUE	37310.9	TRUE	3	21	1	85.7081	69.5393			N	Y
F12	Sepsis9	HK3	UNKNOWN	SYBR	None				28.8309	28.6279	0.219758							TRUE	37310.9	TRUE	3	22	1	85.7081	69.7318	77.0462		N	Y
G1	Ctrl1	18S	UNKNOWN	SYBR	None	1	0.729027	1.37169	15.2285	15.0628	0.166308		-14.7101	0.164223			0	TRUE	18628	TRUE	3	9	1	83.9757	69.7318	63.7647		N	Y
G2	Ctrl2	18S	UNKNOWN	SYBR	None	1	0.729027	1.37169	15.0639	15.0628	0.166308		-14.7101	0.164223			0	TRUE	18628	TRUE	3	9	1	83.9757	69.7318			N	Y
G3	Ctrl3	18S	UNKNOWN	SYBR	None	1	0.729027	1.37169	14.8959	15.0628	0.166308		-14.7101	0.164223			0	TRUE	18628	TRUE	3	9	1	83.9757	69.7318			N	Y
G4	Ctrl4	18S	UNKNOWN	SYBR	None	1.31552	0.59553	2.90597	14.9174	15.3924	0.426402		-15.1057	0.411817			-0.395632	TRUE	18628	TRUE	3	7	1	84.1682	69.7318			N	Y
G5	Ctrl5	18S	UNKNOWN	SYBR	None	1.31552	0.59553	2.90597	15.5176	15.3924	0.426402		-15.1057	0.411817			-0.395632	TRUE	18628	TRUE	3	9	1	84.3607	69.7318			N	Y
G6	Ctrl6	18S	UNKNOWN	SYBR	None	1.31552	0.59553	2.90597	15.7422	15.3924	0.426402		-15.1057	0.411817			-0.395632	TRUE	18628	TRUE	3	9	1	84.5532	69.7318			N	Y
G7	Ctrl7	18S	UNKNOWN	SYBR	None	0.829423	0.56557	1.21637	15.4789	15.4991	0.0497496		-14.4403	0.19896			0.269821	TRUE	18628	TRUE	3	9	1	84.5532	69.7318			N	Y
G8	Ctrl8	18S	UNKNOWN	SYBR	None	0.829423	0.56557	1.21637	15.4627	15.4991	0.0497496		-14.4403	0.19896			0.269821	TRUE	18628	TRUE	3	9	1	84.7457	69.7318			N	Y
G9	Ctrl9	18S	UNKNOWN	SYBR	None	0.829423	0.56557	1.21637	15.5558	15.4991	0.0497496		-14.4403	0.19896			0.269821	TRUE	18628	TRUE	3	9	1	84.5532	69.7318			N	Y
G10	Sepsis1	18S	UNKNOWN	SYBR	None	0.0619763	0.0378285	0.101539	17.3465	17.4182	0.333865		-10.698	0.25653			4.01214	TRUE	18628	TRUE	3	10	1	84.7457	69.5393			N	Y
G11	Sepsis2	18S	UNKNOWN	SYBR	None	0.0619763	0.0378285	0.101539	17.126	17.4182	0.333865		-10.698	0.25653			4.01214	TRUE	18628	TRUE	3	9	1	84.7457	69.7318			N	Y
G12	Sepsis3	18S	UNKNOWN	SYBR	None	0.0619763	0.0378285	0.101539	17.7821	17.4182	0.333865		-10.698	0.25653			4.01214	TRUE	18628	TRUE	3	15	1	84.7457				N	N
H1	Sepsis4	18S	UNKNOWN	SYBR	None	0.0425578	0.0341148	0.0530903	16.8767	16.8334	0.165882		-10.1557	0.114904			4.55443	TRUE	18628	TRUE	3	9	1	83.9757	69.7318	63.7647		N	Y
H2	Sepsis5	18S	UNKNOWN	SYBR	None	0.0425578	0.0341148	0.0530903	16.6501	16.8334	0.165882		-10.1557	0.114904			4.55443	TRUE	18628	TRUE	3	10	1	83.9757	69.7318			N	Y
H3	Sepsis6	18S	UNKNOWN	SYBR	None	0.0425578	0.0341148	0.0530903	16.9733	16.8334	0.165882		-10.1557	0.114904			4.55443	TRUE	18628	TRUE	3	10	1	83.9757	69.7318			N	Y
H4	Sepsis7	18S	UNKNOWN	SYBR	None	0.0967616	0.0619278	0.151189	16.9089	17.2872	0.336205		-11.3407	0.231896			3.36942	TRUE	18628	TRUE	3	10	1	83.9757	69.7318			N	Y
H5	Sepsis8	18S	UNKNOWN	SYBR	None	0.0967616	0.0619278	0.151189	17.4008	17.2872	0.336205		-11.3407	0.231896			3.36942	TRUE	18628	TRUE	3	11	1	84.3607	69.7318			N	Y
H6	Sepsis9	18S	UNKNOWN	SYBR	None	0.0967616	0.0619278	0.151189	17.5518	17.2872	0.336205		-11.3407	0.231896			3.36942	TRUE	18628	TRUE	3	10	1	84.5532	69.5393			N	Y
Analysis Type	Singleplex
Endogenous Control	H
RQ Min/Max Confidence Level	95.0
Reference Sample	W
