# Supplementary material for: Identification of hub genes and prediction of the ceRNA network in adult sepsis
Source: PeerJ. 2025 Aug 13;13:e19619. doi: 10.7717/peerj.19619 (PMC12357545; doi:10.7717/peerj.19619)
Supplement: Supplemental Information 7 [file peerj-13-19619-s007.xls]

## Sheet: Results
Block Type	96alum
Chemistry	SYBR_GREEN
Experiment File Name	C:\Users\jond\Desktop\2022\WJH\模板\CHENLI6.eds
Experiment Run End Time	2023-10-01 23:02:09 下午 CST
Instrument Type	sds7500
Passive Reference
Well	Sample Name	Target Name	Task	Reporter	Quencher	RQ	RQ Min	RQ Max	Cт	Cт Mean	Cт SD	ΔCт	ΔCт Mean	ΔCт SE	HK Control ΔCт Mean	HK Control ΔCт SE	ΔΔCт	Automatic Ct Threshold	Ct Threshold	Automatic Baseline	Baseline Start	Baseline End	Efficiency	Tm1	Tm2	Tm3	Comments	HIGHSD	OUTLIERRG
A1	Sepsis1	18s	UNKNOWN	SYBR	None	1	0.621628	1.60868	18.4654	18.0052	0.419746		-9.84577	0.247034			0	TRUE	26140.1	TRUE	3	13	1	83.8281				N	N
A2	Sepsis2	18s	UNKNOWN	SYBR	None	1	0.621628	1.60868	17.9067	18.0052	0.419746		-9.84577	0.247034			0	TRUE	26140.1	TRUE	3	13	1	84.0216				N	N
A3	Sepsis3	18s	UNKNOWN	SYBR	None	1	0.621628	1.60868	17.6435	18.0052	0.419746		-9.84577	0.247034			0	TRUE	26140.1	TRUE	3	10	1	84.0216				N	N
A4	Sepsis1	CLCE5A	UNKNOWN	SYBR	None	1	0.764603	1.30787	30.9137	31.1141	0.22685		3.26312	0.139465			0	TRUE	26962.8	TRUE	3	25	1	82.086				N	N
A5	Sepsis2	CLCE5A	UNKNOWN	SYBR	None	1	0.764603	1.30787	31.0682	31.1141	0.22685		3.26312	0.139465			0	TRUE	26962.8	TRUE	3	25	1	82.086				N	N
A6	Sepsis3	CLCE5A	UNKNOWN	SYBR	None	1	0.764603	1.30787	31.3604	31.1141	0.22685		3.26312	0.139465			0	TRUE	26962.8	TRUE	3	22	1	82.2795				N	N
B1	Sepsis4	18s	UNKNOWN	SYBR	None	0.999324	0.666873	1.49751	18.4328	18.051	0.343096		-9.84479	0.210175			0.000975927	TRUE	26140.1	TRUE	3	13	1	84.0216				N	N
B2	Sepsis5	18s	UNKNOWN	SYBR	None	0.999324	0.666873	1.49751	17.9515	18.051	0.343096		-9.84479	0.210175			0.000975927	TRUE	26140.1	TRUE	3	13	1	84.2152				N	N
B3	Sepsis6	18s	UNKNOWN	SYBR	None	0.999324	0.666873	1.49751	17.7686	18.051	0.343096		-9.84479	0.210175			0.000975927	TRUE	26140.1	TRUE	3	10	1	84.2152				N	N
B4	Sepsis4	CLCE5A	UNKNOWN	SYBR	None	3.04516	2.38893	3.88165	29.3495	29.5524	0.181411		1.6566	0.126116			-1.60652	TRUE	26962.8	TRUE	3	22	1	82.2795				N	N
B5	Sepsis5	CLCE5A	UNKNOWN	SYBR	None	3.04516	2.38893	3.88165	29.6085	29.5524	0.181411		1.6566	0.126116			-1.60652	TRUE	26962.8	TRUE	3	22	1	82.4731				N	N
B6	Sepsis6	CLCE5A	UNKNOWN	SYBR	None	3.04516	2.38893	3.88165	29.6991	29.5524	0.181411		1.6566	0.126116			-1.60652	TRUE	26962.8	TRUE	3	22	1	82.4731				N	N
C1	Sepsis7	18s	UNKNOWN	SYBR	None	3.6787	2.42479	5.58104	17.8325	17.4929	0.354527		-11.725	0.216585			-1.8792	TRUE	26140.1	TRUE	3	13	1	84.0216				N	N
C2	Sepsis8	18s	UNKNOWN	SYBR	None	3.6787	2.42479	5.58104	17.521	17.4929	0.354527		-11.725	0.216585			-1.8792	TRUE	26140.1	TRUE	3	13	1	84.0216				N	N
C3	Sepsis9	18s	UNKNOWN	SYBR	None	3.6787	2.42479	5.58104	17.1251	17.4929	0.354527		-11.725	0.216585			-1.8792	TRUE	26140.1	TRUE	3	10	1	84.2152				N	N
C4	Sepsis7	CLCE5A	UNKNOWN	SYBR	None	3.05058	2.42345	3.84	30.7725	30.8719	0.166924		1.65403	0.119585			-1.60909	TRUE	26962.8	TRUE	3	22	1	82.4731				N	N
C5	Sepsis8	CLCE5A	UNKNOWN	SYBR	None	3.05058	2.42345	3.84	31.0646	30.8719	0.166924		1.65403	0.119585			-1.60909	TRUE	26962.8	TRUE	3	25	1	82.6667				N	N
C6	Sepsis9	CLCE5A	UNKNOWN	SYBR	None	3.05058	2.42345	3.84	30.7786	30.8719	0.166924		1.65403	0.119585			-1.60909	TRUE	26962.8	TRUE	3	25	1	82.6667				N	N
D1	Ctrl1	18s	UNKNOWN	SYBR	None	1.91528	0.989143	3.70855	21.9944	21.7525	0.210132		-10.7833	0.343354			-0.937554	TRUE	26140.1	TRUE	3	16	1	83.6345				N	N
D2	Ctrl2	18s	UNKNOWN	SYBR	None	1.91528	0.989143	3.70855	21.6481	21.7525	0.210132		-10.7833	0.343354			-0.937554	TRUE	26140.1	TRUE	3	16	1	83.6345				N	N
D3	Ctrl3	18s	UNKNOWN	SYBR	None	1.91528	0.989143	3.70855	21.615	21.7525	0.210132		-10.7833	0.343354			-0.937554	TRUE	26140.1	TRUE	3	16	1	83.6345				N	N
D4	Ctrl1	CLCE5A	UNKNOWN	SYBR	None	0.698608	0.289011	1.6887	35.6618	36.3164	0.567013		3.78056	0.45863			0.517444	TRUE	26962.8	TRUE	3	27	1	81.6988				Y	Y
D5	Ctrl2	CLCE5A	UNKNOWN	SYBR	None	0.698608	0.289011	1.6887	36.6298	36.3164	0.567013		3.78056	0.45863			0.517444	TRUE	26962.8	TRUE	3	29	1	81.6988				Y	N
D6	Ctrl3	CLCE5A	UNKNOWN	SYBR	None	0.698608	0.289011	1.6887	36.6574	36.3164	0.567013		3.78056	0.45863			0.517444	TRUE	26962.8	TRUE	3	29	1	81.6988				Y	N
E1	Ctrl4	18s	UNKNOWN	SYBR	None	8.29677	5.98836	11.495	15.2741	15.0004	0.273362		-12.8983	0.169421			-3.05255	TRUE	26140.1	TRUE	3	10	1	83.4409				N	N
E2	Ctrl5	18s	UNKNOWN	SYBR	None	8.29677	5.98836	11.495	14.7274	15.0004	0.273362		-12.8983	0.169421			-3.05255	TRUE	26140.1	TRUE	3	10	1	83.4409				N	N
E3	Ctrl6	18s	UNKNOWN	SYBR	None	8.29677	5.98836	11.495	14.9998	15.0004	0.273362		-12.8983	0.169421			-3.05255	TRUE	26140.1	TRUE	3	8	1	83.6345				N	N
E4	Ctrl4	CLCE5A	UNKNOWN	SYBR	None	2.04449	1.52344	2.74374	30.0534	30.1301	0.242309		2.23138	0.152858			-1.03174	TRUE	26962.8	TRUE	3	22	1	82.4731				N	N
E5	Ctrl5	CLCE5A	UNKNOWN	SYBR	None	2.04449	1.52344	2.74374	30.4015	30.1301	0.242309		2.23138	0.152858			-1.03174	TRUE	26962.8	TRUE	3	22	1	82.6667				N	N
E6	Ctrl6	CLCE5A	UNKNOWN	SYBR	None	2.04449	1.52344	2.74374	29.9354	30.1301	0.242309		2.23138	0.152858			-1.03174	TRUE	26962.8	TRUE	3	22	1	82.6667				N	N
F1	Ctrl7	18s	UNKNOWN	SYBR	None	43.1843	35.3665	52.7302	14.5827	14.4389	0.125355		-15.2782	0.103774			-5.43243	TRUE	26140.1	TRUE	3	7	1	83.2474				N	N
F2	Ctrl8	18s	UNKNOWN	SYBR	None	43.1843	35.3665	52.7302	14.3814	14.4389	0.125355		-15.2782	0.103774			-5.43243	TRUE	26140.1	TRUE	3	7	1	83.2474				N	N
F3	Ctrl9	18s	UNKNOWN	SYBR	None	43.1843	35.3665	52.7302	14.3527	14.4389	0.125355		-15.2782	0.103774			-5.43243	TRUE	26140.1	TRUE	3	7	1	83.6345				N	N
F4	Ctrl7	CLCE5A	UNKNOWN	SYBR	None	1.35895	0.620887	2.97438	31.9648	32.5378	0.693126		2.82062	0.407029			-0.442496	TRUE	26962.8	TRUE	3	25	1	82.2795				Y	N
F5	Ctrl8	CLCE5A	UNKNOWN	SYBR	None	1.35895	0.620887	2.97438	32.3403	32.5378	0.693126		2.82062	0.407029			-0.442496	TRUE	26962.8	TRUE	3	25	1	82.2795				Y	N
F6	Ctrl9	CLCE5A	UNKNOWN	SYBR	None	1.35895	0.620887	2.97438	33.3082	32.5378	0.693126		2.82062	0.407029			-0.442496	TRUE	26962.8	TRUE	3	27	1	82.2795				Y	N
Analysis Type	Singleplex
Endogenous Control	4
RQ Min/Max Confidence Level	95.0
Reference Sample	HONG
