# Supplementary material for: Identification of hub genes and prediction of the ceRNA network in adult sepsis
Source: PeerJ. 2025 Aug 13;13:e19619. doi: 10.7717/peerj.19619 (PMC12357545; doi:10.7717/peerj.19619)
Supplement: Supplemental Information 8 [file peerj-13-19619-s008.xls]

## Sheet: Results
Block Type	96alum
Chemistry	SYBR_GREEN
Experiment File Name	C:\Users\jond\Desktop\2022\WJH\模板\chen5.eds
Experiment Run End Time	2023-10-01 02:51:31 上午 CST
Instrument Type	sds7500
Passive Reference
Well	Sample Name	Target Name	Task	Reporter	Quencher	RQ	RQ Min	RQ Max	Cт	Cт Mean	Cт SD	ΔCт	ΔCт Mean	ΔCт SE	HK Control ΔCт Mean	HK Control ΔCт SE	ΔΔCт	Automatic Ct Threshold	Ct Threshold	Automatic Baseline	Baseline Start	Baseline End	Efficiency	Tm1	Tm2	Tm3	Comments	HIGHSD	OUTLIERRG	MTP
A1	Ctrl1	18s	UNKNOWN	SYBR	None				15.6022	15.3433	0.189959							TRUE	19767.5	TRUE	3	7	1	84.0801				N	N	N
A2	Ctrl2	18s	UNKNOWN	SYBR	None				15.3685	15.3433	0.189959							TRUE	19767.5	TRUE	3	7	1	84.2725				N	N	N
A3	Ctrl3	18s	UNKNOWN	SYBR	None				15.1046	15.3433	0.189959							TRUE	19767.5	TRUE	3	7	1	84.2725				N	N	N
A4	Ctrl4	18s	UNKNOWN	SYBR	None				15.1483	15.3433	0.189959							TRUE	19767.5	TRUE	3	8	1	84.2725				N	N	N
A5	Ctrl5	18s	UNKNOWN	SYBR	None				15.3612	15.3433	0.189959							TRUE	19767.5	TRUE	3	8	1	84.2725				N	N	N
A6	Ctrl6	18s	UNKNOWN	SYBR	None				15.4753	15.3433	0.189959							TRUE	19767.5	TRUE	3	8	1	84.4649				N	N	N
A7	Ctrl1	EFL1	UNKNOWN	SYBR	None				26.8665	26.4995	0.296604							TRUE	39768	TRUE	3	19	1	84.4649	62.724	69.8427		N	N	Y
A8	Ctrl2	EFL1	UNKNOWN	SYBR	None				26.7838	26.4995	0.296604							TRUE	39768	TRUE	3	19	1	84.4649	62.724	69.8427		N	N	Y
A9	Ctrl3	EFL1	UNKNOWN	SYBR	None				26.6143	26.4995	0.296604							TRUE	39768	TRUE	3	19	1	84.2725	62.724	79.2702		N	N	Y
A10	Ctrl4	EFL1	UNKNOWN	SYBR	None				26.1506	26.4995	0.296604							TRUE	39768	TRUE	3	19	1	84.4649	62.724	69.8427		N	N	Y
A11	Ctrl5	EFL1	UNKNOWN	SYBR	None				26.2563	26.4995	0.296604							TRUE	39768	TRUE	3	19	1	84.4649	79.0778	62.724		N	N	Y
A12	Ctrl6	EFL1	UNKNOWN	SYBR	None				26.3254	26.4995	0.296604							TRUE	39768	TRUE	3	20	1	84.4649	79.0778	62.724		N	N	Y
B1	Sepsis1	18s	UNKNOWN	SYBR	None				15.4954	15.1001	0.255365							TRUE	19767.5	TRUE	3	8	1	84.2725				N	N	N
B2	Sepsis2	18s	UNKNOWN	SYBR	None				14.8303	15.1001	0.255365							TRUE	19767.5	TRUE	3	7	1	84.2725				N	N	N
B3	Sepsis3	18s	UNKNOWN	SYBR	None				14.8574	15.1001	0.255365							TRUE	19767.5	TRUE	3	7	1	84.2725				N	N	N
B4	Sepsis4	18s	UNKNOWN	SYBR	None				15.0292	15.1001	0.255365							TRUE	19767.5	TRUE	3	7	1	84.4649				N	N	N
B5	Sepsis5	18s	UNKNOWN	SYBR	None				15.1065	15.1001	0.255365							TRUE	19767.5	TRUE	3	7	1	84.4649				N	N	N
B6	Sepsis6	18s	UNKNOWN	SYBR	None				15.2817	15.1001	0.255365							TRUE	19767.5	TRUE	3	7	1	84.6573				N	N	N
B7	Sepsis1	EFL1	UNKNOWN	SYBR	None				26.4234	26.2104	0.169989							TRUE	39768	TRUE	3	19	1	84.4649	79.2702	62.5316		N	N	Y
B8	Sepsis2	EFL1	UNKNOWN	SYBR	None				26.2767	26.2104	0.169989							TRUE	39768	TRUE	3	19	1	84.6573	79.4626	62.724		N	N	Y
B9	Sepsis3	EFL1	UNKNOWN	SYBR	None				26.2609	26.2104	0.169989							TRUE	39768	TRUE	3	19	1	84.4649	79.4626	62.724		N	N	Y
B10	Sepsis4	EFL1	UNKNOWN	SYBR	None				26.2721	26.2104	0.169989							TRUE	39768	TRUE	3	19	1	84.4649	79.4626	62.724		N	N	Y
B11	Sepsis5	EFL1	UNKNOWN	SYBR	None				26.091	26.2104	0.169989							TRUE	39768	TRUE	3	19	1	84.2725	79.2702	62.724		N	N	Y
B12	Sepsis6	EFL1	UNKNOWN	SYBR	None				25.9382	26.2104	0.169989							TRUE	39768	TRUE	3	19	1	79.2702	83.8877	62.724		N	N	Y
Analysis Type	Singleplex
Endogenous Control	c
RQ Min/Max Confidence Level	95.0
Reference Sample	DAN1

## Sheet: Sheet1
Sample Name	Target Name	Cт							Sample Name	Target Name	Cт
DAN1	e	26.8665	11.3711	0.0283313	1.01983				DAN2	18s	15.4954
DAN1	e	26.7838	11.9535	-0.554097	0.681083				DAN2	18s	14.8303
DAN1	e	26.6143	11.7569	-0.357493	0.78052				DAN2	18s	14.8574
DAN1	e	26.1506	11.1214	0.277966	1.21248				DAN2	18s	15.0292
DAN1	e	26.2563	11.1498	0.249588	1.18887				DAN2	18s	15.1065
DAN1	e	26.3254	11.0437	0.355704	1.27961				DAN2	18s	15.2817
DAN2	e	26.4234	10.8212	0.578253	1.49304				DAN1	18s	15.6022
DAN2	e	26.2767	10.9082	0.491237	1.40565				DAN1	18s	15.3685				DN3	18s	13.9008
DAN2	e	26.2609	11.1563	0.243083	1.18352				DAN1	18s	15.1046				DN3	18s	13.6329
DAN2	e	26.2721	11.1238	0.275573	1.21047				DAN1	18s	15.1483				DN3	18s	13.4702
DAN2	e	26.091	10.7299	0.66955	1.59058				DAN1	18s	15.3612				DN3	18s	13.6384
DAN2	e	25.9382	10.4629	0.936555	1.91395				DAN1	18s	15.4753				DN3	18s	14.0853
QUAN2	c	32.6215	17.3193	-0.352146	0.783418				QUAN2	18s	15.3022				DN3	18s	14.0583
QUAN2	c	32.8297	17.8107	0.139191	1.10129				QUAN2	18s	15.0191				DN3	e	26.3895
QUAN2	c	32.7528	18.0772	0.405742	1.32477				QUAN2	18s	14.6756				DN3	e	26.2866
QUAN2	c	32.7265	17.8583	0.186837	1.13827				QUAN2	18s	14.8682				DN3	e	26.1326
QUAN2	c	33.1558	17.2295	-0.441978	0.736125				QUAN2	18s	15.9263				DN3	e	26.1601
QUAN2	c	32.8921	17.7338	0.0623543	1.04417				QUAN2	18s	15.1583				DN3	e	25.479
QUAN1	c	31.8422	14.7264	-2.94513	0.129846				QUAN1	18s	17.1159				DN3	e	25.9272
QUAN1	c	31.4607	14.6354	-3.03606	0.121914				QUAN1	18s	16.8252
QUAN1	c	31.4447	14.7186	-2.95286	0.129152				QUAN1	18s	16.7261
QUAN1	c	31.618	14.6192	-3.05226	0.120553				QUAN1	18s	16.9987
QUAN1	c	31.3928	14.045	-3.62645	0.0809712				QUAN1	18s	17.3478
QUAN1	c	31.9697	14.2621	-3.4094	0.0941173				QUAN1	18s	17.7076
