# Supplementary material for: Identification of hub genes and prediction of the ceRNA network in adult sepsis
Source: PeerJ. 2025 Aug 13;13:e19619. doi: 10.7717/peerj.19619 (PMC12357545; doi:10.7717/peerj.19619)
Supplement: Supplemental Information 9 [file peerj-13-19619-s009.xls]

## Sheet: Results
Block Type	96alum
Chemistry	SYBR_GREEN
Experiment File Name	C:\Users\jond\Desktop\2022\WJH\模板\CHEN3.eds
Experiment Run End Time	2023-09-20 00:09:43 上午 CST
Instrument Type	sds7500
Passive Reference
Well	Sample Name	Target Name	Task	Reporter	Quencher	RQ	RQ Min	RQ Max	Cт	Cт Mean	Cт SD	ΔCт	ΔCт Mean	ΔCт SE	HK Control ΔCт Mean	HK Control ΔCт SE	ΔΔCт	Automatic Ct Threshold	Ct Threshold	Automatic Baseline	Baseline Start	Baseline End	Efficiency	Tm1	Tm2	Tm3	Comments	MTP
B1	LPS-24h	ELF1	UNKNOWN	SYBR	None	1	0.880589	1.1356	28.9077	28.7893	0.187133		9.94429	0.0823373			0	TRUE	29438.1	TRUE	3	22	1	83.2815				N
B2	LPS-24h	ELF1	UNKNOWN	SYBR	None	1	0.880589	1.1356	29.0004	28.7893	0.187133		9.94429	0.0823373			0	TRUE	29438.1	TRUE	3	21	1	83.4746				N
B3	LPS-24h	ELF1	UNKNOWN	SYBR	None	1	0.880589	1.1356	28.636	28.7893	0.187133		9.94429	0.0823373			0	TRUE	29438.1	TRUE	3	21	1	83.2815				N
B4	LPS-24h	ELF1	UNKNOWN	SYBR	None	1	0.880589	1.1356	28.9534	28.7893	0.187133		9.94429	0.0823373			0	TRUE	29438.1	TRUE	3	20	1	83.6676				N
B5	LPS-24h	ELF1	UNKNOWN	SYBR	None	1	0.880589	1.1356	28.6835	28.7893	0.187133		9.94429	0.0823373			0	TRUE	29438.1	TRUE	3	22	1	83.8607				N
B6	LPS-24h	ELF1	UNKNOWN	SYBR	None	1	0.880589	1.1356	28.555	28.7893	0.187133		9.94429	0.0823373			0	TRUE	29438.1	TRUE	3	20	1	84.0538				N
B7	LPS-24h	18s	UNKNOWN	SYBR	None				18.8143	18.845	0.0752177							TRUE	27378.5	TRUE	3	11	1	84.826				N
B8	LPS-24h	18s	UNKNOWN	SYBR	None				18.868	18.845	0.0752177							TRUE	27378.5	TRUE	3	11	1	85.0191				N
B9	LPS-24h	18s	UNKNOWN	SYBR	None				18.8712	18.845	0.0752177							TRUE	27378.5	TRUE	3	9	1	85.0191				N
B10	LPS-24h	18s	UNKNOWN	SYBR	None				18.8069	18.845	0.0752177							TRUE	27378.5	TRUE	3	10	1	85.0191				N
B11	LPS-24h	18s	UNKNOWN	SYBR	None				18.9656	18.845	0.0752177							TRUE	27378.5	TRUE	3	9	1	85.0191				N
B12	LPS-24h	18s	UNKNOWN	SYBR	None				18.7444	18.845	0.0752177							TRUE	27378.5	TRUE	3	9	1	85.0191				N
C1	0H	ELF1	UNKNOWN	SYBR	None	0.222016	0.162957	0.302479	35.3405	34.9955	0.484428		12.1156	0.200244			2.17127	TRUE	29438.1	TRUE	3	28	1	83.4746	74.2075			Y
C2	0H	ELF1	UNKNOWN	SYBR	None	0.222016	0.162957	0.302479	34.3782	34.9955	0.484428		12.1156	0.200244			2.17127	TRUE	29438.1	TRUE	3	25	1	83.4746				N
C3	0H	ELF1	UNKNOWN	SYBR	None	0.222016	0.162957	0.302479	34.9212	34.9955	0.484428		12.1156	0.200244			2.17127	TRUE	29438.1	TRUE	3	26	1	83.4746				N
C4	0H	ELF1	UNKNOWN	SYBR	None	0.222016	0.162957	0.302479	35.2583	34.9955	0.484428		12.1156	0.200244			2.17127	TRUE	29438.1	TRUE	3	27	1	83.6676				N
C5	0H	ELF1	UNKNOWN	SYBR	None	0.222016	0.162957	0.302479	34.4919	34.9955	0.484428		12.1156	0.200244			2.17127	TRUE	29438.1	TRUE	3	22	1	83.8607				N
C6	0H	ELF1	UNKNOWN	SYBR	None	0.222016	0.162957	0.302479	35.5829	34.9955	0.484428		12.1156	0.200244			2.17127	TRUE	29438.1	TRUE	3	23	1	84.2468	75.1728			Y
C7	0H	18s	UNKNOWN	SYBR	None				22.7569	22.88	0.0769125							TRUE	27378.5	TRUE	3	15	1	84.826				N
C8	0H	18s	UNKNOWN	SYBR	None				22.8168	22.88	0.0769125							TRUE	27378.5	TRUE	3	14	1	85.2121				N
C9	0H	18s	UNKNOWN	SYBR	None				22.9492	22.88	0.0769125							TRUE	27378.5	TRUE	3	12	1	85.2121				N
C10	0H	18s	UNKNOWN	SYBR	None				22.8918	22.88	0.0769125							TRUE	27378.5	TRUE	3	15	1	85.2121				N
C11	0H	18s	UNKNOWN	SYBR	None				22.9321	22.88	0.0769125							TRUE	27378.5	TRUE	3	16	1	85.0191				N
C12	0H	18s	UNKNOWN	SYBR	None				22.9329	22.88	0.0769125							TRUE	27378.5	TRUE	3	16	1	85.0191				N
Analysis Type	Singleplex
Endogenous Control	18s
RQ Min/Max Confidence Level	95.0
Reference Sample	0h
