# Supplementary material for: Identification of hub genes and prediction of the ceRNA network in adult sepsis
Source: PeerJ. 2025 Aug 13;13:e19619. doi: 10.7717/peerj.19619 (PMC12357545; doi:10.7717/peerj.19619)
Supplement: Supplemental Information 10 [file peerj-13-19619-s010.xlsx]

## Sheet: Sheet1
Time of collection	ID	Name	Number of blood collections	Whether dead at 28 days (0 no, 1 yes)	Diagnosis (1 sepsis, 2 severe sepsis, 3 septic shock)	Sex (0 female, 1 male)	Regression (0 deaths 1 improvement 2 deterioration)	Age	Whether 2 blood collections were completed (0 completed, 1 completed)	Cause of death	PLT(✖109/L)	platelet distribution width	platelet distribution volume	Large platelet ratio	Plateletcrit	WBC(✖109/L)	PCT(ng/ml)	CRP	IL-6	PT	APTT	Fib	D-D	Prothrombin Time Activity%	A score	S score	diagnosis
2023-11-01	0596480		2	1	3	0	0	31	1		16	17	13	52.1	0.021	30.39	53.19↑	125.33	4721	15.4	50.4	2.15	11600	61.7	30	21	1.Parametritis and Pelvic cellulitis 2.Mechanical intestinal obstruction 3.Septic shock Multiple organ failure 4.Metastatic cervical malignancy 5.Pelvic abscess in females 6.Pulmonary infection 7.Urinary tract infection 8.Subarachnoid hemorrhage 9.Hypoxic-ischemic encephalopathy 10.After nephrostomy 11.After left ureteral stent implantation 12.After small bowel enterostomy 13.Hypoproteinemia 14.E…
2023-12-09	0282964		2	1	3	1	0	88	1		20	15.9	10.2	41.2	0.02	6.75	17.41↑	187.9	583.7	15.6	68.9	3.49	3582	60.5	34	19	1. severe pneumonia Bilateral pleural effusion 2. sepsis Infectious shock 3. symptomatic epilepsy 4. hypoproteinemia 5. chronic obstructive pulmonary disease emphysema 6. radiological hepatitis Liver cirrhosis decompensated stage 7. chronic renal insufficiency Renal anemia 8. thalassemia 9. post-splenectomy
2023-11-03	1997128		2	1	3	1	0	88			10	15.8	9.5	25.9	0.01	5.79	#	155.56	2494	15.8	53.4	2.84	8288	59.3	39	16	1. gastrointestinal perforation (gastric sinus) peritonitis infectious shock 2. cerebral hemorrhage combined with fracture subdural hematoma (traumatic) right frontotemporal parietal soft tissue contusion 3. acute renal insufficiency 4. pulmonary infection interstitial lung disease pulmonary arterial hypertension 5. right cerebellar hemisphere old cerebral infarction 6. emphysema combined with mu…
2023-11-07	1879660		1	1	3	0	0	56	0		70	16.3	11.3	36.8	0.113	36.8	48	221.81	>5000	26.7	50	3.84	8900	28.1	33	15	1, Severe Aureus pneumonia Respiratory failure; 2, Infectious shock; 3, Aureus sepsis; 4, Multi-organ failure (respiratory, circulatory, renal, hematologic); 5, Left frontal lobe cerebral hemorrhage Subarachnoid hemorrhage Cerebral herniation; 6, Venous thrombosis of the left lower extremity; 7, Electrolyte metabolism disorders; 8, Hypoproteinemia; 9, Nutritional risk; 10, Lumbar intervertebral d…
2023-11-09	2033081		1	0	3	0	1	78			59	16.7	13.8	52.7	0.082	18.21	15.29	29.02	30.48	12.8	29.2	1.98	9724	81.5	22	13	1. urinary tract infection 2. sepsis 3. dilatation of the upper right ureter with hydronephrosis 4. acute upper gastrointestinal hemorrhage 5. type 2 diabetes mellitus with multiple complications 6. post cerebral infarction stage 7. post left lower extremity amputation 8. coronary artery disease
2023-11-15	0338975		1	0	2	1	1	69	0		51	17.2	12	37.9	0.062	10.4	41.52↑	285.06	16.46	15.3	41.3	6.15	1547	62.4	15	12	1, choledochal stones with acute cholangitis; 2, gallbladder stones with acute attack of chronic cholecystitis; 3, infectious shock; 4, type 2 diabetes mellitus; 5, gout; 6, renal insufficiency
2023-11-16	1916438		2	0	3	1	1	93	1		85	16.5	13.3	50.5	0.112	6.47	15.12↑	60.82	27.71	14.6	32.8	5.47	641	67.2	26	11	1. severe pneumonia 2. septic shock 3. acute cardiac insufficiency 4. paralytic intestinal obstruction 5. acute subdural hemorrhage (left) 6. subdural hematoma (bilateral frontal, left frontal, parietal, and temporal) 7. vascular dementia 8. acute renal insufficiency 9. thoracic vertebral degenerative changes 10. main arterial sclerosis Bilateral lower extremity arterial sclerosis with plaque for…
2023-11-27	2184978		1	0	1	1	1	48			154	16.6	9.4	22.2	0.1444	12.87	18.58↑	165.61	91.13	20.4	41.4	4.83	3706	39.8	16	6	[K63.210] Anastomotic fistula, rectal [K65.003] Acute diffuse peritonitis [K65.005] Abscess in abdominal cavity [R57.200] Infectious shock [C80.000x001] Anastomotic recurrence after surgery for rectal cancer
2023-12-15	1465464		1	0	2	0	1	83	0		55	16.6	11.2	35.4	0.061	2.19	2.59	41.61	54.22	13.3	30.2	4.96	694	77.5	10	5	1, E. coli sepsis; 2, pulmonary infection; 3, urinary tract infection; 4, hypoproteinemia; 5, mild anemia; 6, leukopenia; 7, thrombocytopenia; 8, hypertension (grade 3, very high-risk group), hypertensive heart disease; 9, coronary heart disease, cardiac function grade 2; 10, rheumatoid arthritis.

## Sheet: Sheet2
ID	姓名	CLEC4D	GPR84	HK3	S100A12	CLCE5A
0596480		27.9199	95.477	26.4619	34.3818	19.3445
0282964		10.8624	19.1776	13.5325	18.0201	4.84789
1997128		14.8194	84.5618	19.9467	34.0298	16.0033
1879660		11.7322	24.0961	18.5361	19.645	7.94924
2033081		9.612	34.6834	24.4612	24.958	11.1776
0338975		14.0775	75.275	21.8694	27.7893	32.3138
1916438		5.93097	12.8586	11.1041	6.02795	5.23155
2184978		3.65861	16.2806	12.3967	9.33716	6.81785
1465464		4.78833	9.50648	8.01499	5.50014	4.63923
